# Supplementary material for: Variability in proteoglycan biosynthetic genes reveals new facets of heparan sulfates diversity. A systematic review and analysis
Source: bioRxiv or medRxiv preprint supplement (doi:10.1101/2022.04.18.22273971), 2022-04-25
Supplement: Supplementary file [file media-2.pdf]

## SUPPLEMENTARY TABLE

### THE HSPG BIOSYNTHETIC MACHINERY GENES

| Gene           | Full name                                               | NCBI gene ID | Chromosome | Location      | Sequence : location                                   | Also know as                                            |
|----------------|---------------------------------------------------------|--------------|------------|---------------|-------------------------------------------------------|---------------------------------------------------------|
| <b>AGRN</b>    | <i>agrin</i>                                            | 375790       | 1          | 1p36.33       | NC_000001.11<br>(1020102..1056119)                    | CMS8; AGRIN;<br>CMSPPD                                  |
| <b>B3GALT6</b> | <i>beta-1,3-galactosyltransferase 6</i>                 | 126792       | 1          | 1p36.33       | NC_000001.11<br>(1232237..1235041)                    | ALGAZ; EDSP2;<br>EDSSPD2; SEMDJL1;<br>beta3GalT6        |
| <b>B3GAT3</b>  | <i>beta-1,3-glucuronyltransferase 3</i>                 | 26229        | 11         | 11q12.3       | NC_000011.10<br>(62615296..62621986,<br>complement)   | JDSCD; GLCATI;<br>glcUAT-I                              |
| <b>B4GALT7</b> | <i>beta-1,4-galactosyltransferase 7</i>                 | 11285        | 5          | 5q35.3        | NC_000005.10<br>(177600102..177610330)                | XGPT; EDSP1; XGPT1;<br>EDSSLA; XGALT1;<br>EDSSPD1       |
| <b>CANT1</b>   | <i>calcium activated nucleotidase 1</i>                 | 124583       | 17         | 17q25.3       | NC_000017.11<br>(78991716..79009793,<br>complement)   | DBQD; EDM7;<br>DBQD1; SCAN1;<br>SHAPY; SCAN-1           |
| <b>COL18A1</b> | <i>collagen type XVIII alpha 1 chain</i>                | 80781        | 21         | 21q22.3       | NC_000021.9<br>(45405165..45513720)                   | KS; KNO; GLCC; KNO1                                     |
| <b>EXT1</b>    | <i>exostosin glycosyltransferase 1</i>                  | 2131         | 8          | 8q24.11       | NC_000008.11:<br>117,762,756 - 118,143,560            | EXT, LGCR, LGS,<br>TRPS2, TTV                           |
| <b>EXT2</b>    | <i>exostosin glycosyltransferase 2</i>                  | 2132         | 11         | 11p11.2       | NC_000011.10:<br>44,079,906 - 44,267,624              | SOTV, SSMS                                              |
| <b>EXTL1</b>   | <i>exostosin like glycosyltransferase 1</i>             | 2134         | 1          | 1p36.11       | NC_000001.11:<br>26,020,269 - 26,037,936              | EXTL                                                    |
| <b>EXTL2</b>   | <i>exostosin like glycosyltransferase 2</i>             | 2135         | 1          | 1p21.2        | NC_000001.11:100,870,068<br>- 100,897,715             | EXTR2                                                   |
| <b>EXTL3</b>   | <i>exostosin like glycosyltransferase 3</i>             | 2137         | 8          | 8p21.1        | NC_000008.11:28,592,950<br>- 28,770,385               | RPR; BOTV; REGR;<br>EXTR1; ISDNA; EXTL1L                |
| <b>GPC1</b>    | <i>glypican 1</i>                                       | 2817         | 2          | 2q37.3        | NC_000002.12<br>(240435663..240468076)                | glypican                                                |
| <b>GPC2</b>    | <i>glypican 2</i>                                       | 221914       | 7          | 7q22.1        | NC_000007.14<br>(100169606..100177381,<br>complement) |                                                         |
| <b>GPC3</b>    | <i>glypican 3</i>                                       | 2719         | X          | Xq26.2        | NC_000023.11<br>(133535745..133985616,<br>complement) | SGB; DGSX; MXR7;<br>SDYS; SGBS; OCI-5;<br>SGBS1; GTR2-2 |
| <b>GPC4</b>    | <i>glypican 4</i>                                       | 2239         | X          | Xq26.2        | NC_000023.11<br>(133300103..133415489,<br>complement) | KPTS; K-glypican                                        |
| <b>GPC5</b>    | <i>glypican 5</i>                                       | 2262         | 13         | 13q31.3       | NC_000013.11<br>(91398621..92867237)                  |                                                         |
| <b>GPC6</b>    | <i>glypican 6</i>                                       | 10082        | 13         | 13q31.3-q32.1 | NC_000013.11<br>(93226807..94408020)                  | OMIMD1                                                  |
| <b>GLCE</b>    | <i>glucuronic acid epimerase</i>                        | 26035        | 15         | 15q23         | NC_000015.10:<br>69,149,389 - 69,283,375              | HSEPI                                                   |
| <b>HPSE</b>    | <i>heparanase</i>                                       | 10855        | 4          | 4q21.23       | NC_000004.12:<br>83,288,192 - 83,339,422              | HPA; HPA1; HPR1;<br>HSE1; HPSE1                         |
| <b>HPSE2</b>   | <i>heparanase 2</i>                                     | 60495        | 10         | 10q24.2       | NC_000010.11<br>(98457077..99235875,<br>complement)   | UFS; HPA2; HPR2;<br>UFS1                                |
| <b>HS2ST1</b>  | <i>heparan sulfate 2-O-sulfotransferase 1</i>           | 9653         | 1          | 1p22.3        | NC_000001.11:<br>86,895,099 - 87,129,534              | dJ604K5.2                                               |
| <b>HS3ST1</b>  | <i>heparan sulfate-glucosamine 3-sulfotransferase 1</i> | 9957         | 4          | 4p15.33       | NC_000004.12:<br>11,389,025 - 11,438,523              | 3OST; 3OST1                                             |
| <b>HS3ST2</b>  | <i>heparan sulfate-glucosamine 3-sulfotransferase 2</i> | 9956         | 16         | 16p12.2       | NC_000016.10:<br>22,803,944 - 22,926,556              | 3OST2; 3OST2                                            |

|                 |                                                           |        |    |              |                                                       |                                                 |
|-----------------|-----------------------------------------------------------|--------|----|--------------|-------------------------------------------------------|-------------------------------------------------|
| <b>HS3ST3A1</b> | <i>heparan sulfate-glucosamine 3-sulfotransferase 3A1</i> | 9955   | 17 | 17p12        | NC_000017.11:<br>13,483,238 - 13,612,768              | 3OST3A1; 3-OST-3A                               |
| <b>HS3ST3B1</b> | <i>heparan sulfate-glucosamine 3-sulfotransferase 3B1</i> | 9953   | 17 | 17p12        | NC_000017.11:<br>14,296,214 - 14,354,242              | 3OST3B1; 3-OST-3B;<br>h3-OST-3B                 |
| <b>HS3ST4</b>   | <i>heparan sulfate-glucosamine 3-sulfotransferase 4</i>   | 9951   | 16 | 16p12.1      | NC_000016.10:<br>25,647,386 - 26,182,261              | 3OST4; 3OST4; 3-OST-4;<br>h3-OST-4              |
| <b>HS3ST5</b>   | <i>heparan sulfate-glucosamine 3-sulfotransferase 5</i>   | 222537 | 6  | 6q21-q22.1   | NC_000006.12:<br>114,026,901 - 114,371,118            | 3OST5; 3-OST-5;<br>HS3OST5; NBLA04021           |
| <b>HS3ST6</b>   | <i>heparan sulfate-glucosamine 3-sulfotransferase 6</i>   | 64711  | 16 | 16p13.3      | NC_000016.10<br>(1911475..1921428,<br>complement)     | 3OST6; HS3ST5; 3-OST-6                          |
| <b>HS6ST1</b>   | <i>heparan sulfate 6-O-sulfotransferase 1</i>             | 9394   | 2  | 2q14.3       | NC_000002.12:<br>128,260,141 - 128,324,207            | HH15; HS6ST                                     |
| <b>HS6ST2</b>   | <i>heparan sulfate 6-O-sulfotransferase 2</i>             | 90161  | X  | Xq26.2       | NC_000023.11:<br>132,592,471 - 132,994,934            | MRXSPM                                          |
| <b>HS6ST3</b>   | <i>heparan sulfate 6-O-sulfotransferase 3</i>             | 266722 | 13 | 13q32.1      | NC_000013.11<br>(96090107..96839562)                  | HS6ST-3                                         |
| <b>HSPG2</b>    | <i>heparan sulfate proteoglycan 2</i>                     | 3339   | 1  | 1p36.12      | NC_000001.11<br>(21822244..21937310,<br>complement)   | PLC; SJA; SJS; HSPG;<br>SJS1; PRCAN             |
| <b>NDST1</b>    | <i>N-deacetylase and N-sulfotransferase 1</i>             | 3340   | 5  | 5q33.1       | NC_000005.10:<br>150,478,540 - 150,565,454            | HSST; NST1; MRT46                               |
| <b>NDST2</b>    | <i>N-deacetylase and N-sulfotransferase 2</i>             | 8509   | 10 | 10q22.2      | NC_000010.11:<br>73,800,917 - 73,812,843              | NST2; HSST2; N-HSST<br>2                        |
| <b>NDST3</b>    | <i>N-deacetylase and N-sulfotransferase 3</i>             | 9348   | 4  | 4q26         | NC_000004.12:<br>118,010,760 - 118,281,507            | HSST3                                           |
| <b>NDST4</b>    | <i>N-deacetylase and N-sulfotransferase 4</i>             | 64579  | 4  | 4q26         | NC_000004.12:<br>114,795,121 - 115,143,134            | N-HSST; NDST-4;<br>NHSST4; N-HSST 4             |
| <b>PXYLP1</b>   | <i>2-phosphoxylose phosphatase 1</i>                      | 92370  | 3  | 3q23         | NC_000003.12<br>(141231825..141294924)                | XYLP; ACPL2; HEL124                             |
| <b>SDC1</b>     | <i>syndecan 1</i>                                         | 6382   | 2  | 2p24.1       | NC_000002.12<br>(20200797..20225475,<br>complement)   | SDC; CD138; SYND1;<br>syndecan                  |
| <b>SDC2</b>     | <i>syndecan 2</i>                                         | 6383   | 8  | 8q22.1       | NC_000008.11<br>(96493601..96611790)                  | HSPG; CD362; HSPG1;<br>SYND2                    |
| <b>SDC3</b>     | <i>syndecan 3</i>                                         | 9672   | 1  | 1p35.2       | NC_000001.11<br>(30869466..30909735,<br>complement)   | SDCN; SYND3                                     |
| <b>SDC4</b>     | <i>syndecan 4</i>                                         | 6385   | 20 | 20q13.12     | NC_000020.11<br>(45325288..45348424,<br>complement)   | SYND4                                           |
| <b>SLC10A7</b>  | <i>solute carrier family 10 member 7</i>                  | 84068  | 4  | 4q31.22      | NC_000004.12<br>(146253981..146522351,<br>complement) | P7; SSASKS; C4orf13                             |
| <b>SULF1</b>    | <i>sulfatase 1</i>                                        | 23213  | 8  | 8q13.2-q13.3 | NC_000008.11:<br>69,447,195 - 69,680,341              | SULF-1                                          |
| <b>SULF2</b>    | <i>sulfatase 2</i>                                        | 55959  | 20 | 20q13.12     | NC_000020.11:<br>47,641,363 - 47,799,835              | HSULF-2                                         |
| <b>FAM20B</b>   | <i>FAM20B glycosaminoglycan xylosylkinase</i>             | 9917   | 1  | 1q25.2       | NC_000001.11<br>(179025804..179076567)                | gxl1                                            |
| <b>XYLT1</b>    | <i>xylosyltransferase 1</i>                               | 64131  | 16 | 16p12.3      | NC_000016.10<br>(17101769..17470960,<br>complement)   | XT1; XTI; XT-I; DBQD2;<br>XYLTI; PXYLT1; xylT-I |
| <b>XYLT2</b>    | <i>xylosyltransferase 2</i>                               | 64132  | 17 | 17q21.33     | NC_000017.11<br>(50346126..50361185)                  | SOS; XT2; XT-II;<br>PXYLT2; xylT-II             |
